# Supplementary material for: Technical note: Intercomparison study of the elemental carbon radiocarbon analysis methods using synthetic known samples
Source: Copernicus journal article supplement (doi:10.5194/acp-23-7495-2023), 2023-07-11
Supplement: Supplementary file 1 [file acp-23-7495-2023-supplement.pdf]

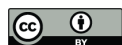

*Supplement of*

## **Technical note: Intercomparison study of the elemental carbon radiocarbon analysis methods using synthetic known samples**

**Xiangyun Zhang et al.**

*Correspondence to:* Jun Li (junli@gig.ac.cn) and Gan Zhang (zhanggan@gig.ac.cn)

The copyright of individual parts of the supplement might differ from the article licence.

**Contents of this file**

**1. Analytical Methods**

**2. Supplemental Tables:**

**Table S1.** C%, OC/EC, EC/TC (TOT) %,  $\delta^{13}\text{C}$  of the typical combustion samples.

**Table S2.** Composition ratio information (C% weight) of the six hybrid samples.

**Table S3.** The calculated and measured TC results of C% and  $\delta^{13}\text{C}\text{‰}$ ,  $f_M$  for the six hybrid samples.

**Table S4.** The EC/TC results of samples, including four combustion source samples and six synthetic known samples, isolated by four purification methods.

**Table S5.** Solid-state  $^{13}\text{C}$  NMR structural parameters for Corn straw combustion, Pine wood combustion, Vehicle exhaust and Coal combustion.

**Table S6.** The deviation between the results of different separation methods and the theoretical values, according to the ratio of herbaceous to woody combustion.

**3. Supplemental Figures:**

**Figure S1.** Composition ratio information (C% weight) of the six synthetic known samples.

**Figure S2.** Solid-state  $^{13}\text{C}$  NMR spectrum of Corn straw combustion, Pine wood combustion, Vehicle exhaust and Coal combustion

**Figure S3.** The field emission scanning electron microscopy (FESEM) results of Corn straw combustion, Pine wood combustion, Vehicle exhaust and Coal combustion.

## 1. Analytical Methods

### OC/EC and TOC analysis:

The OC and EC in the three combustion source samples were analyzed by the TOT method, performed with a laboratory OC/EC analyzer (Sunset Laboratory, USA) using the NIOSH2 thermal protocol. (Salma et al., 2004; Maenhaut et al., 2005) Details regarding the method can be found in the SI. The total organic carbon (TOC) concentration of the aerosols was also determined. For each sample, 4 punches (4.8 mm diameter) were placed in precombusted Ag capsules, and the inorganic carbon was removed by acidification, as described above. After drying, the TOC was quantified by using a high-temperature catalytic CHN elemental analyzer.

### Carbon isotope analysis (Liu et al., 2013; Liu et al., 2017; Xu, et al., 2007):

The samples were analyzed for  $^{13}\text{C}$  using a FLASH2000 Elemental Analyzer connected to a Thermo MAT-253 isotope ratio mass spectrometer. The results are reported using standard delta notation in permil units (‰):  $\delta \text{ (‰)} = (\text{R}_{\text{sample}} - \text{R}_{\text{reference}}) / \text{R}_{\text{reference}} \times 1000$ , where  $\delta \text{ (‰)}$  stands for  $\delta^{13}\text{C} \text{ (‰)}$ , and  $\text{R}_{\text{sample}}$  and  $\text{R}_{\text{reference}}$  are the isotopic ratios of the sample and reference material, respectively. For carbon, the reference standard is Vienna Pee Dee Belemnite (VPDB). The analytical precision for the international and in-house reference materials was generally better than  $\pm 0.5\text{‰}$  for  $\delta^{13}\text{C}$ . Replicate measurements of samples yielded similar standard deviations.

Preparation of graphite targets for accelerator mass spectrometry (AMS) analysis was performed using the graphitization line at Guangzhou Institute of Geochemistry of the Chinese Academy of Sciences (CAS) via the hydrogen and zinc reduction method (Xu et al., 2007). The  $^{14}\text{C}/^{12}\text{C}$  ratios in the graphite samples were determined using a compact AMS instrument (NEC, National Electrostatics Corporation, USA) at the Guangzhou Institute of Geochemistry, CAS. AMS calibration was performed using standards (Oxalic Acid Standards I and II) and blanks. The  $\delta^{13}\text{C}$  value was obtained during AMS measurements and applied to correct the  $^{14}\text{C}$  measurements for isotopic fractionation. The fraction modern ( $f_m$ ) was determined by comparing the measured  $^{14}\text{C}/^{12}\text{C}$  ratio in a sample with that in a modern standard (NBS Oxalic Acid I in AD 1950). All of the reported  $f_m$  values were corrected for  $\delta^{13}\text{C}$  fractionation and for  $^{14}\text{C}$  decay over the time period between 1950 and the year of measurement.

### $^{13}\text{C}$ solid state NMR experiments:

All the  $^{13}\text{C}$  solid state NMR experiments were performed using an AVANCE III 400-MHz NMR spectrometer (Bruker, Billerica, MA, USA). The resonance frequency of  $^{13}\text{C}$  is 100.613/MHz, and glycine was used as a standard for chemical shift calibration. And NMR experiments were run with a Bruker 4 mm double-resonance probe head and a  $\text{ZrO}_2$  rotor. Cross Polarization-Total Sideband Suppression/Magic angle spinning (CP-TOSS/MAS) and Cross Polarization-Total Sideband

Suppression with dipolar dephasing/Magic angle spinning (CP-TOSS-DD/MAS) spectra were run at a spinning speed of 5 kHz. The acquisition time is 5.12  $\mu$ s, and the spectral width is 100 kHz. The 90°  $^{13}\text{C}$  pulse length was 11  $\mu$ s and the recycle delay time is 1 s. And the number of scans is from 4k to 20k. (Zhang et al., 2019; Chen et al., 2020) The data was processed with Bruker.Topspin3.1 software.

#### **Field emission scanning electron microscopy (FESEM):**

**FESEM** was used to observe the particle characteristics of typical carbon aerosol samples. The field emission scanning electron microscope (Hitachi su8010, Hitachi, Japan) has higher resolution than the traditional scanning electron microscope, and its resolution can be as high as 2 nanometers under high voltage. It can be used to observe the micro surface morphology and composition distribution of various material particles, and has higher imaging quality. The scanning electron microscope was used to observe the morphology and particle size of amorphous organic matter in carbonaceous aerosol samples, as well as the relationship between amorphous organic matter and quartz membrane fiber under electron microscope. The low voltage mode (accelerating voltage of about 1-2 kV, beam current of 10  $\mu$  a, working distance of about 3-8 mm) was selected, or the deceleration mode under low voltage condition (working distance less than 3 mm) was selected. The backscattering image was taken in a typical field of view with a magnification of 3000-100000 times.

2. Supplemental Tables:

**Table S1.** C%, OC/EC, EC/TC (TOT) %,  $\delta^{13}\text{C}$  of the typical combustion samples.

| Sample                | C%             | OC/EC | EC/TC(TOT)% | $\delta^{13}\text{C}$ ‰ |
|-----------------------|----------------|-------|-------------|-------------------------|
|                       | ( $\pm 3.0$ %) |       |             | ( $\pm 0.5$ ‰)          |
| Corn straw combustion | 24.64          | 18.47 | 5.14        | -14.02                  |
| Pine wood combustion  | 22.99          | 17.10 | 5.52        | -24.41                  |
| Vehicle exhaust       | 14.49          | 2.42  | 29.21       | -27.10                  |
| Coal combustion       | 11.60          | 3.85  | 20.62       | -24.32                  |

**Table S2.** Composition ratio information (C% weight) of the six hybrid samples.

| Sample | C%<br>(Corn straw<br>combustion) | C%<br>(Vehicle<br>exhaust) | C%<br>(Coal<br>combustion) | Sample | C%<br>(Pine wood<br>combustion) | C%<br>(Vehicle<br>exhaust) | C%<br>(Coal<br>combustion) |
|--------|----------------------------------|----------------------------|----------------------------|--------|---------------------------------|----------------------------|----------------------------|
| S1     | 56.29                            | 14.99                      | 28.72                      | S4     | 56.27                           | 15.02                      | 28.71                      |
| S2     | 65.92                            | 19.81                      | 14.27                      | S5     | 65.93                           | 19.74                      | 14.34                      |
| S3     | 70.77                            | 19.71                      | 9.52                       | S6     | 70.80                           | 19.69                      | 9.50                       |

**Table S3.** The calculated and measured TC results of C% and  $\delta^{13}\text{C}\text{‰}$ ,  $f_M$  for the six hybrid samples.

| Sample | C% (TC)      | C% (TC)         | $\delta^{13}\text{C}\text{‰}$ (TC) | $\delta^{13}\text{C}\text{‰}$ (TC) | $f_M$ (TC)   | $f_M$ (TC)          |
|--------|--------------|-----------------|------------------------------------|------------------------------------|--------------|---------------------|
|        | (calculated) | (measured)      | (calculated)                       | (measured)                         | (calculated) | (measured)          |
|        |              | ( $\pm 3.0\%$ ) |                                    | ( $\pm 0.5\text{‰}$ )              |              |                     |
| S1     | 17.26        | 17.70           | -18.94                             | -18.71                             | 0.5629       | $0.5930 \pm 0.0021$ |
| S2     | 18.97        | 19.10           | -18.08                             | -17.74                             | 0.6592       | $0.6831 \pm 0.0021$ |
| S3     | 19.79        | 19.39           | -17.58                             | -17.40                             | 0.7077       | $0.7220 \pm 0.0021$ |
| S4     | 17.76        | 18.18           | -24.56                             | -24.66                             | 0.5869       | $0.6117 \pm 0.0030$ |
| S5     | 19.17        | 19.31           | -24.65                             | -24.67                             | 0.6818       | $0.7157 \pm 0.0039$ |
| S6     | 19.82        | 20.08           | -24.63                             | -24.63                             | 0.7290       | $0.7705 \pm 0.0038$ |

**Table S4.** The EC/TC results of samples, including four combustion source samples and six synthetic known samples, isolated by four purification methods.

| Sample     | EC/TC(TOT)<br>% | EC/TC(Hypy)<br>% | EC/TC(CT<br>O-375) % | EC/TC(EC <sub>He</sub> /<br>O <sub>2</sub> -475) % | EC/TC(EC <sub>LARA</sub><br>) % |
|------------|-----------------|------------------|----------------------|----------------------------------------------------|---------------------------------|
| Corn straw | 5.14            | 2.49             | 0.38                 | 8.54                                               | 1.92                            |
| combustion | 5.52            | 11.40            | 0.47                 | 35.30                                              | 37.57                           |
| Pine wood  |                 |                  |                      |                                                    |                                 |
| combustion |                 |                  |                      |                                                    |                                 |
| Vehicle    | 29.21           | 22.94            | 5.74                 | 12.37                                              | 15.38                           |
| exhaust    |                 |                  |                      |                                                    |                                 |
| Coal       | 20.62           | 20.76            | 1.34                 | 13.64                                              | 9.84                            |
| combustion |                 |                  |                      |                                                    |                                 |
| S1         | 13.19           | 17.32            | 0.87                 | 4.29                                               | 8.10                            |
| S2         | 12.11           | 14.16            | 0.52                 | 3.86                                               | 8.44                            |
| S3         | 11.35           | 10.60            | 0.48                 | 4.31                                               | 6.88                            |
| S4         | 14.09           | 16.68            | 0.09                 | 29.00                                              | 23.59                           |
| S5         | 13.75           | 13.65            | 0.22                 | 29.55                                              | 25.64                           |
| S6         | 12.56           | 11.52            | 0.18                 | 28.32                                              | 27.87                           |

215 **Table S5.** Solid-state <sup>13</sup>C NMR structural parameters for Corn straw combustion, Pine wood combustion, Vehicle exhaust and Coal combustion.

| Sample          |       | fa   | fa <sup>C</sup> | fa'  | fa <sup>H</sup> | fa <sup>N</sup> | fa <sup>P</sup> | fa <sup>S</sup> | fa <sup>B</sup> | fal  | fal <sup>H</sup> | fal* | fal <sup>O</sup> | C  | FAA  | FMA  | Cn'  | faC+ 0.5*(faP+ falO)* 100 |
|-----------------|-------|------|-----------------|------|-----------------|-----------------|-----------------|-----------------|-----------------|------|------------------|------|------------------|----|------|------|------|---------------------------|
| Corn            | straw | 0.48 | 0.03            | 0.46 | 0.21            | 0.25            | 0.05            | 0.08            | 0.32            | 0.52 | 0.22             | 0.14 | 0.22             | 64 | 0.28 | 0.27 | 6.5  | 13.53                     |
| combustion      |       |      |                 |      |                 |                 |                 |                 |                 |      |                  |      |                  |    |      |      |      |                           |
| Pine            | wood  | 0.51 | 0.01            | 0.50 | 0.22            | 0.28            | 0.04            | 0.1             | 0.35            | 0.49 | 0.18             | 0.16 | 0.2              | 68 | 0.28 | 0.33 | 4.9  | 12.01                     |
| combustion      |       |      |                 |      |                 |                 |                 |                 |                 |      |                  |      |                  |    |      |      |      |                           |
| Vehicle exhaust |       | 0.41 | 0.03            | 0.38 | 0.09            | 0.29            | 0.03            | 0.07            | 0.28            | 0.59 | 0.3              | 0.15 | 0.18             | 86 | 0.26 | 0.25 | 8.43 | 10.53                     |
| Coal combustion |       | 0.73 | 0.06            | 0.67 | 0.29            | 0.38            | 0.08            | 0.14            | 0.45            | 0.27 | 0.11             | 0.09 | 0.08             | 56 | 0.33 | 0.33 | 1.93 | 8.06                      |

216

| Structural parameter | Chemical shift range (ppm) | Carbon type                      | Parameter | Definition                                                     | Description                                        |
|----------------------|----------------------------|----------------------------------|-----------|----------------------------------------------------------------|----------------------------------------------------|
| fa                   | 90-240                     | Aromatic-carboxyl-carbonyl-amide | C         |                                                                | Average carbons per aromatic cluster <sup>49</sup> |
| fa <sup>C</sup>      | 165-240                    | Carboxyl-carbonyl-amide          | FAA       | (fa <sup>P</sup> + fa <sup>S</sup> )/fa'                       | Fraction of aromatic carbons with attachments      |
| fa'                  | 90-165                     | Aromatic                         | FMA       | fal*/fal                                                       | Fraction of methyl in aliphatic                    |
| fa <sup>H</sup>      | 90-165                     | Protonated aromatic (w/o DD)     | Cn'       | fal/fa <sup>S</sup>                                            | Average aliphatic carbon chain length              |
| fa <sup>N</sup>      | 90-165                     | Non-protonated aromatic (w/ DD)  |           | fa <sup>C</sup> + 0.5(fa <sup>P</sup> + fal <sup>O</sup> )*100 | A lower limit estimate for organic oxygen          |
| fa <sup>P</sup>      | 150-165                    | Phenoxy-phenolic                 |           |                                                                |                                                    |
| fa <sup>S</sup>      | 135-150                    | Alkyl-substituted aromatic       |           |                                                                |                                                    |
| fa <sup>B</sup>      | 90-135                     | Bridgehead aromatic              |           |                                                                |                                                    |
| fal                  | 0-90                       | Aliphatic                        |           |                                                                |                                                    |
| fal <sup>H</sup>     | 22-50                      | Methylene/methine                |           |                                                                |                                                    |
| fal*                 | 0-22 & 50-60               | Methyl/methoxy                   |           |                                                                |                                                    |
| fal <sup>O</sup>     | 50-90                      | Alcohol/ether                    |           |                                                                |                                                    |

217

218

219

220

221

222 **Table S6.** The deviation between the results of different separation methods and the theoretical values, according to the ratio of herbaceous to woody combustion.

|                           | Biomass*   |       | Hypy        | CTO-375     | EC <sub>He/O2-475</sub> | EC <sub>LARA</sub> |
|---------------------------|------------|-------|-------------|-------------|-------------------------|--------------------|
|                           | Herbaceous | Woody |             |             |                         |                    |
| Africa                    | 0.79       | 0.21  | -37.38±1.36 | 93.88±20.79 | 57.85 ±6.84             | 14.80 ±6.84        |
| Asia                      | 0.55       | 0.45  | -21.15±3.28 | 85.12±16.08 | 73.51 ±4.33             | 44.76 ±5.22        |
| Australia/Oceania         | 0.91       | 0.09  | -45.49±3.35 | 98.27±23.21 | 50.02 ±8.12             | -0.19 ±7.74        |
| Central America/Caribbean | 0.10       | 0.90  | 9.27±11. 26 | 68.68 ±8.61 | 102.88 ±1.97            | 100.94±3.90        |
| Europe                    | 0.27       | 0.73  | -2.22±8.23  | 74.89±11.06 | 91.79 ±1.93             | 79.72 ±4.00        |
| North America             | 0.10       | 0.90  | 9.27±11.26  | 68.68 ±8.61 | 102.88 ±1.97            | 100.94±3.90        |
| South America             | 0.39       | 0.61  | -10.34±6.10 | 79.27±13.11 | 83.96 ±2.80             | 64.74 ±4.40        |
| Global average            | 0.58       | 0.42  | -23.18±2.76 | 86.21±16.66 | 71.56 ±4.64             | 41.01 ±5.41        |

223 \* The ratio of herbaceous and woody was calculated according to the reference (Bond et al., 2004; Zhang et al., 2004; Streets et al., 2003; Stevens et al., 2017)

224

225

### 3. Supplemental Figures:

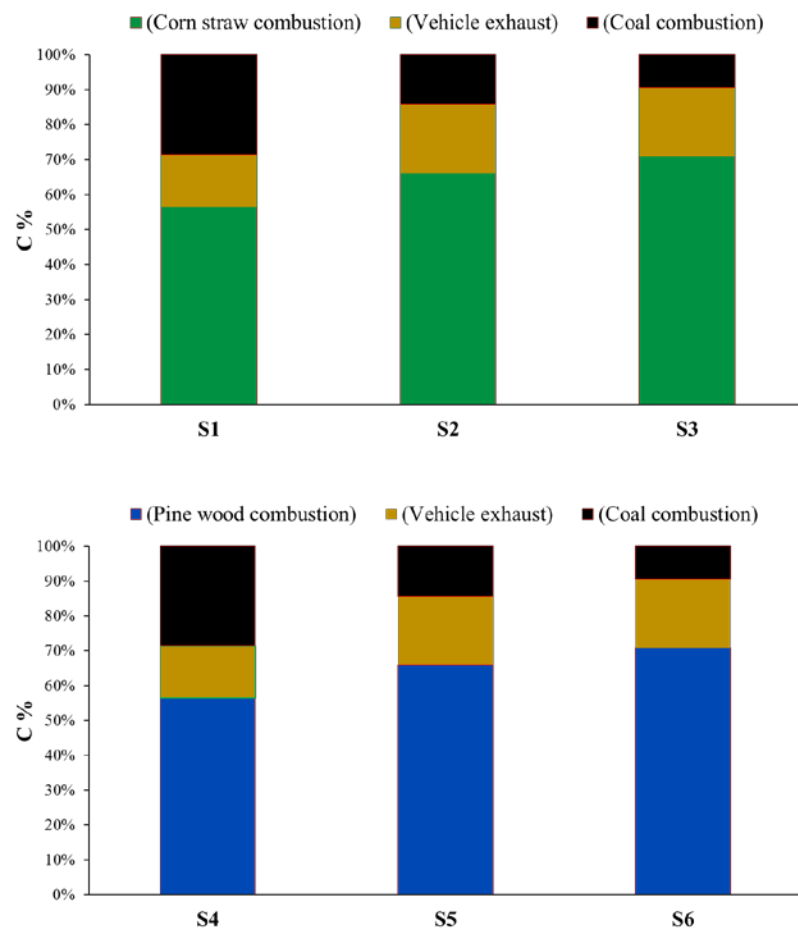

**Figure S1.** Composition ratio information (C% weight) of the six synthetic known samples.

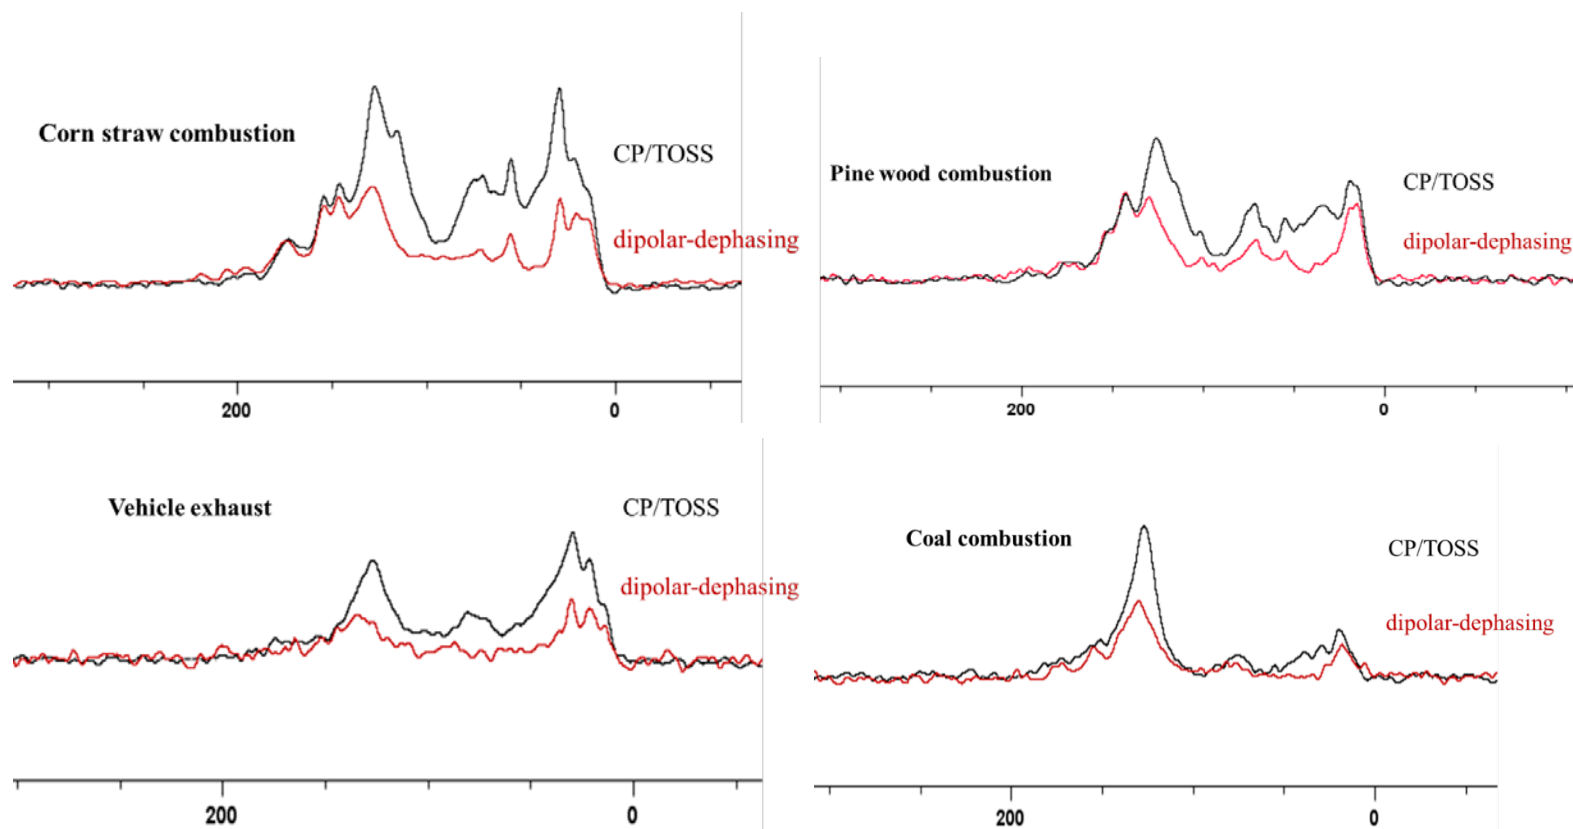

**Figure S2.** Solid-state  $^{13}\text{C}$  NMR spectrum of Corn straw combustion, Pine wood combustion, Vehicle exhaust and Coal combustion.

$^{13}\text{C}$  CP/TOSS and CP/TOSS/DD NMR for the identification of functional groups in the samples. Black lines: CP/TOSS/DD NMR, unselective CP/TOSS spectra. Red lines: CP/TOSS/DD NMR, CP/TOSS with dipolar dephasing to select non-protonated carbons and mobile groups.

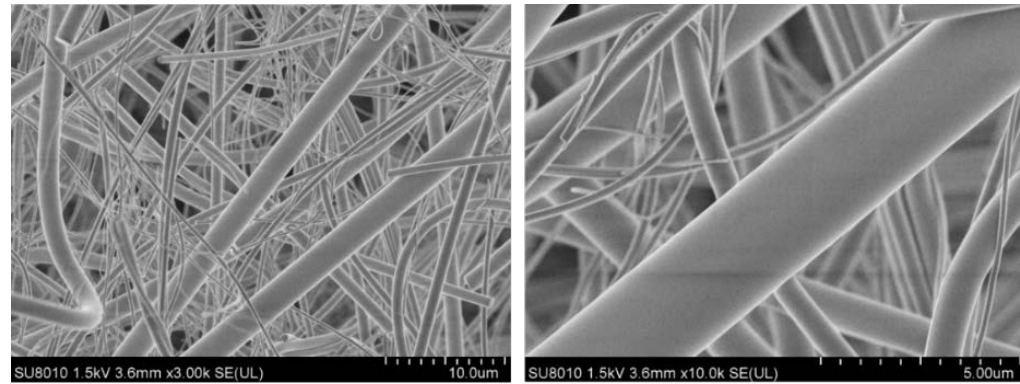

**BLANK**

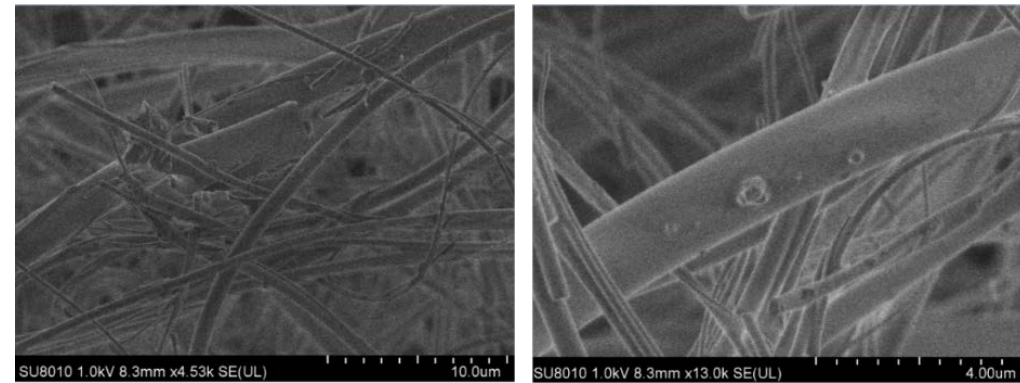

Corn stem combustion

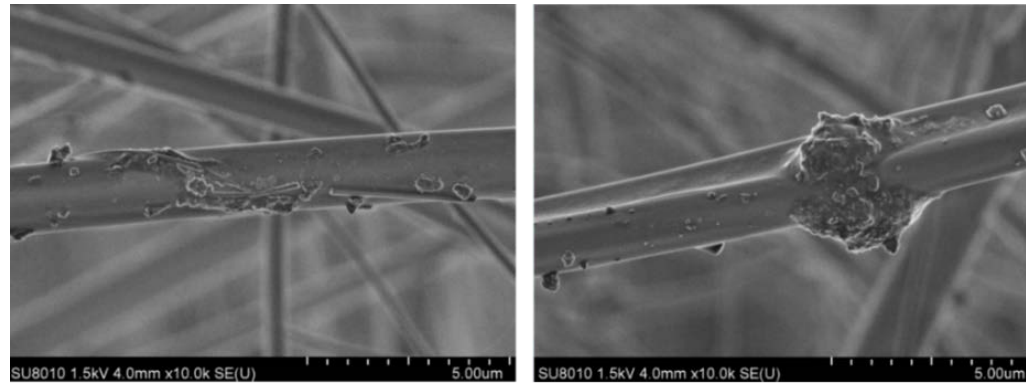

Pine wood combustion

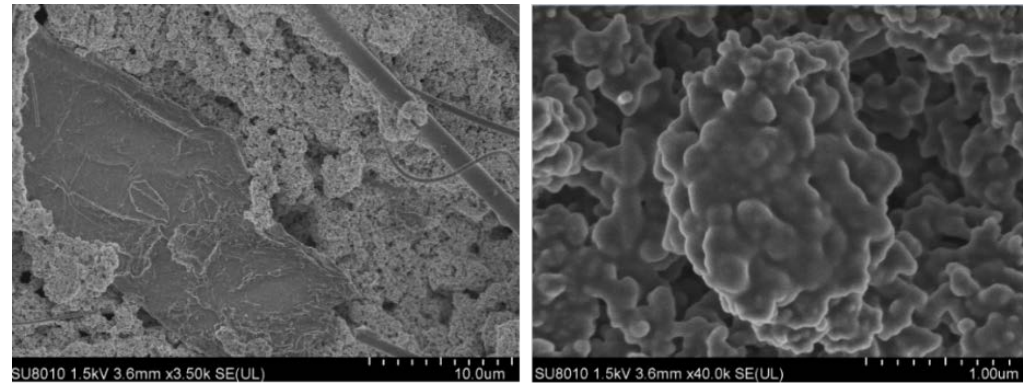

Vehicle exhaust

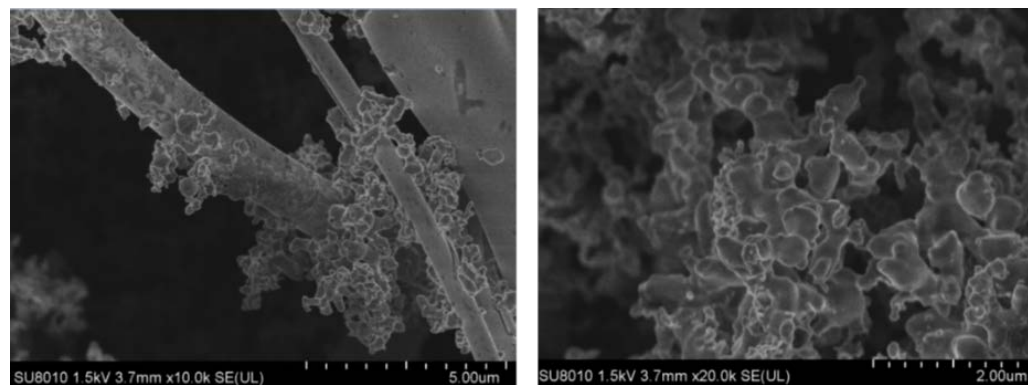

Coal combustion

**Figure S3.** The field emission scanning electron microscopy (FESEM) results of Corn straw combustion, Pine wood combustion, Vehicle exhaust and Coal combustion.

## REFERENCES CITED

- Bond, T. C., Streets, D. G., Yarber, K. F., Nelson, S. M., Woo, J. H. and Klimont, Z.: A technology-based global inventory of black and organic carbon emissions from combustion, *J. Geophys. Res.-Atmos.*, 109(D14), 43, doi:10.1029/2003jd003697, 2004.
- Currie, L. A., et al.: A critical evaluation of interlaboratory data on total, elemental, and isotopic carbon in the carbonaceous particle reference material, NIST SRM 1649a, *J. Res. Natl. Inst. Stand. Technol.*, 107(3), 279-298, doi:10.6028/jres.107.022, 2002.
- Chen, J., Jia, W. L., Yu, C. L., Zhang, X. Y. and Peng, P. A.: Bound hydrocarbons and structure of pyrobitumen rapidly formed by asphaltene cracking: Implications for oil-source correlation, *Org. Geochem.*, 146, 16, doi:10.1016/j.orggeochem.2020.104053, 2020.
- Heal, M. R., Naysmith, P., Cook, G. T., Xu, S., Duran, T. R., Harrison, R. M.: Application of C-14 analyses to source apportionment of carbonaceous PM<sub>2.5</sub> in the UK, *Atmos. Environ.* 45, (14), 2341-2348, 2011.
- Liu, D., Li, J., Zhang, Y. L., Xu, Y., Liu, X., Ding, P., Shen, C. D., Chen, Y. J., Tian, C. G. and Zhang, G.: The Use of Levoglucosan and Radiocarbon for Source Apportionment of PM<sub>2.5</sub> Carbonaceous Aerosols at a Background Site in East China, *Environ. Sci. Technol.*, 47(18), 10454-10461, doi:10.1021/es401250k, 2013.
- Liu, J. W., Li, J., Ding, P., Zhang, Y. L., Liu, D., Shen, C. D. and Zhang, G.: Optimizing isolation protocol of organic carbon and elemental carbon for C-14 analysis using fine particulate samples, *Atmos. Environ.*, 154, 9-19, doi:10.1016/j.atmosenv.2017.01.027, 2017.
- Maenhaut, W., Raes, N., Chi, X. G., Cafmeyer, J., Wang, W. and Salma, I.: Chemical composition and mass closure for fine and coarse aerosols at a kerbside in Budapest, Hungary, in spring 2002, *X-Ray Spectrom.*, 34(4), 290-296, doi:10.1002/xrs.820, 2005.
- Mao, J. D. and Schmidt-Rohr, K.: Accurate quantification of aromaticity and nonprotonated aromatic carbon fraction in natural organic matter by C-13 solid-state nuclear magnetic resonance, *Environmental Science & Technology*, 38(9): 2680-2684, 2004.
- Reddy, C. M., Pearson, A., Xu, L., McNichol, A. P., Benner, B. A., Wise, S. A., Klouda, G. A., Currie, L. A., Eglinton, T. I.: Radiocarbon as a tool to apportion the sources of polycyclic aromatic hydrocarbons and black carbon in environmental samples, *Environ. Sci. Technol.*, 36, (8),

1774-1782, 2002.

- Salma, I., Chi, X. G. and Maenhaut, W.: Elemental and organic carbon in urban canyon and background environments in Budapest, Hungary, *Atmos. Environ.*, 38(1), 27-36, doi:10.1016/j.atmosenv.2003.09.047, 2004.
- Stevens, N., Lehmann, C. E. R., Murphy, B. P. and Durigan, G.: Savanna woody encroachment is widespread across three continents, *Glob. Change Biol.*, 23(1), 235-244, doi:10.1111/gcb.13409, 2017.
- Streets, D. G., Yarber, K. F., Woo, J. H. and Carmichael, G. R.: Biomass burning in Asia: Annual and seasonal estimates and atmospheric emissions, *Glob. Biogeochem. Cycle*, 17(4), 20, doi:10.1029/2003gb002040, 2003.
- Szidat, S., Jenk, T. M., Gaggeler, H. W., Synal, H. A., Hajdas, I., Bonani, G. and Saurer, M.: THEODORE, a two-step heating system for the EC/OC determination of radiocarbon (C-14) in the environment, *Nucl. Instrum. Methods Phys. Res. Sect. B-Beam Interact. Mater. Atoms*, 223, 829-836, doi:10.1016/j.nimb.2004.04.153, 2004b.
- Xu, X.M., Trumbore, S.E., Zheng, S.H., Southon, J.R., McDuffee, K.E., Luttgen, M. and Liu, J.C.: Modifying a sealed tube zinc reduction method for preparation of AMS graphite targets: Reducing background and attaining high precision, *Nuclear Instruments & Methods in Physics Research Section B-Beam Interactions with Materials and Atoms*, 259(1): 320-329, 2007.
- Zhang, W. M., Brandt, M., Penuelas, J., Guichard, F., Tong, X. Y., Tian, F. and Fensholt, R.: Ecosystem structural changes controlled by altered rainfall climatology in tropical savannas, *Nat. Commun.*, 10, 7, doi:10.1038/s41467-019-08602-6, 2019a.
- Zhang, X. Y., et al.: Isolation and radiocarbon analysis of elemental carbon in atmospheric aerosols using hydropyrolysis, *Atmos. Environ.*, 198, 381-386, doi:10.1016/j.atmosenv.2018.11.005, 2019b.
